# Supplementary figures and images for: α-synuclein acts in the nucleus to inhibit histone acetylation and promote neurotoxicity
Source: Oxford University Press journal article supplement (doi:10.1093/hmg/ddl243), 2006-09-07

Figure 5S

**A**

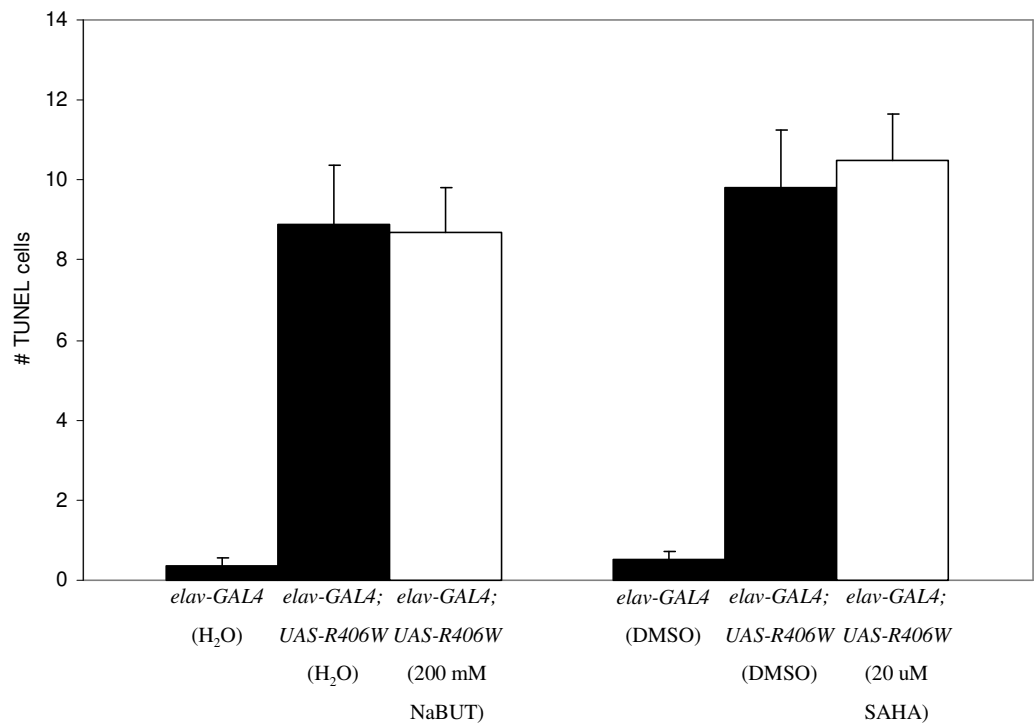

**B**

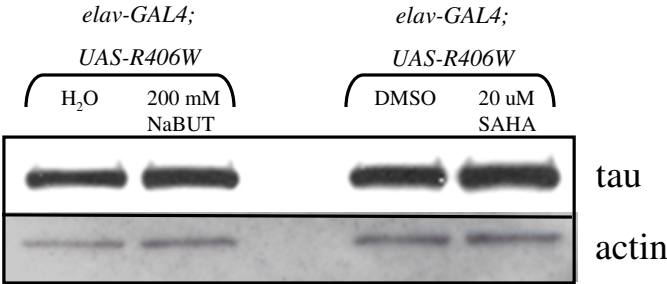

Supplement: ddl243_Supplementary_Data.zip [file ddl243_Supplementary_Data.zip]

Figure 2S

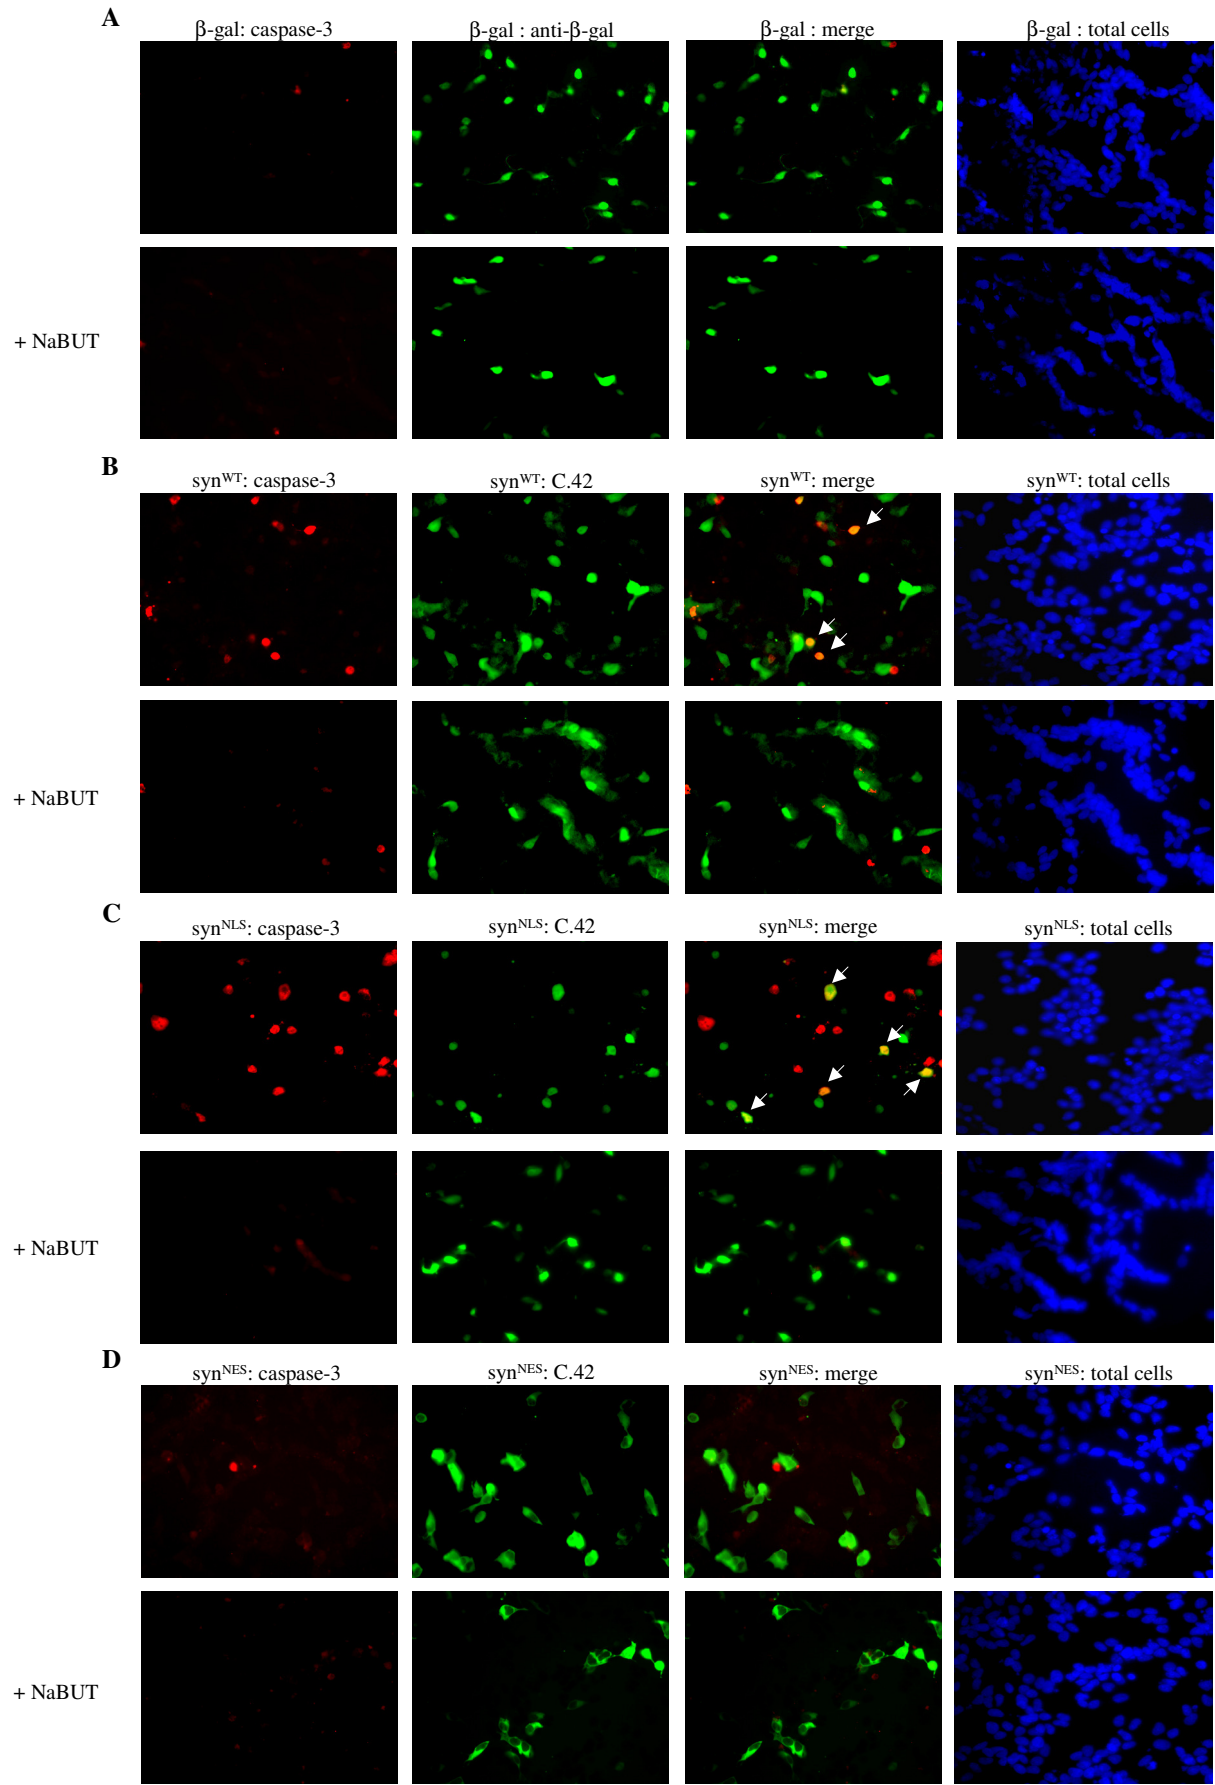

Supplement: ddl243_Supplementary_Data.zip [file ddl243_Supplementary_Data.zip]

Figure 4S

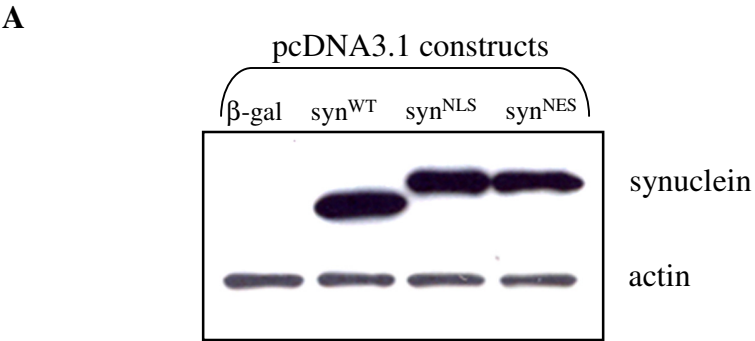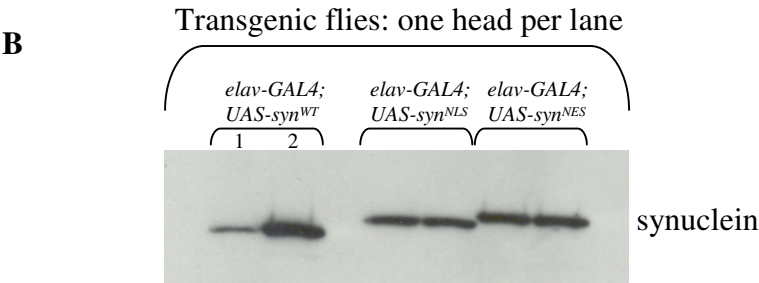

Supplement: ddl243_Supplementary_Data.zip [file ddl243_Supplementary_Data.zip]

Figure 3S

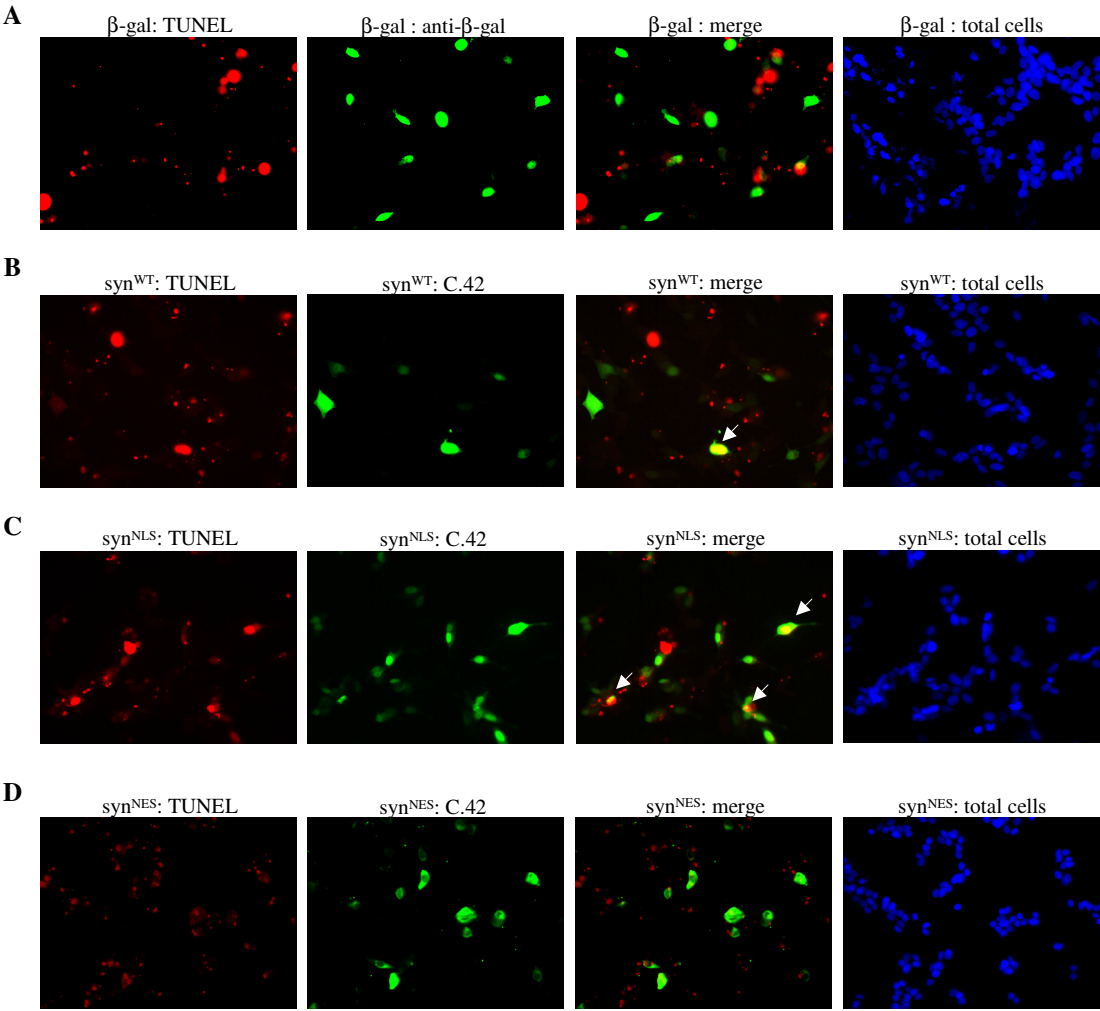

Supplement: ddl243_Supplementary_Data.zip [file ddl243_Supplementary_Data.zip]

Figure 1S

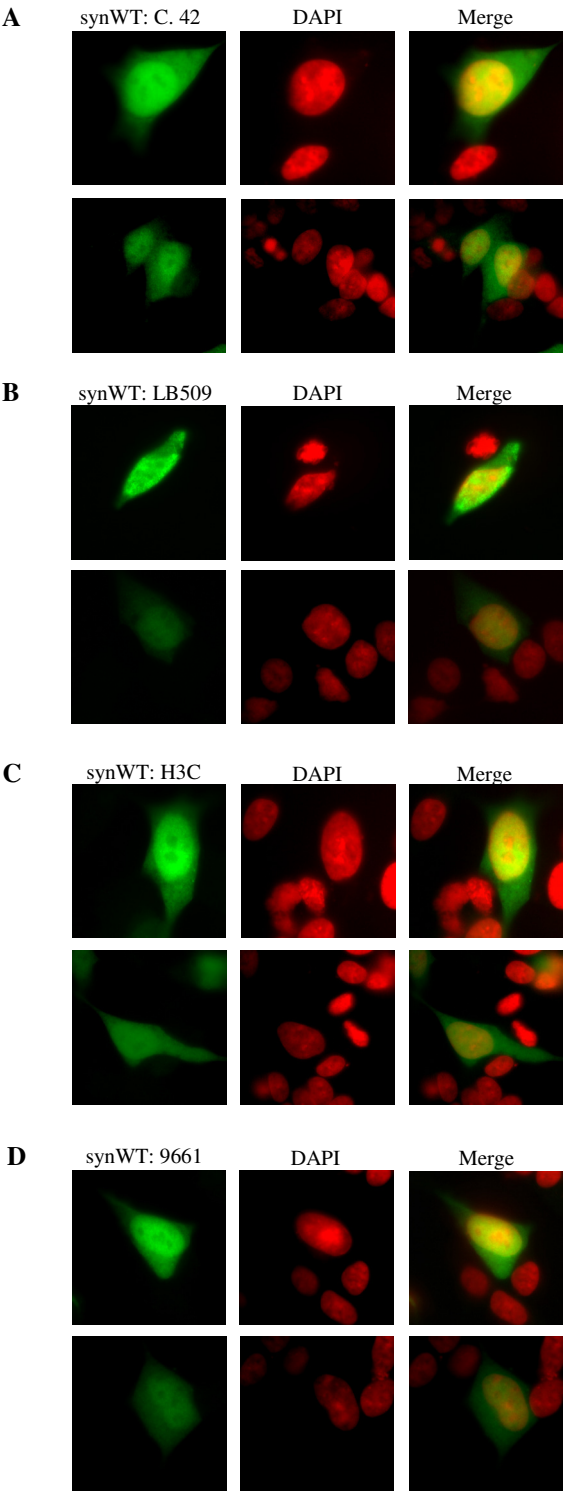

Supplement: ddl243_Supplementary_Data.zip [file ddl243_Supplementary_Data.zip]
